# Supplementary material for: Cross-reactivity of antibodies against interferon beta in multiple sclerosis patients and interference of the JAK-STAT signaling pathway
Source: PubMed Central journal article supplement (PMC5707350; doi:10.1038/s41598-017-16828-x), 2017-11-29
Supplement: 41598_2017_16828_MOESM1_ESM.pdf [file 41598_2017_16828_MOESM1_ESM.pdf]

**TITLE: Cross-reactivity of antibodies against interferon beta in multiple sclerosis patients and interference of the JAK-STAT signaling pathway.**

**Authors:** Isaac Hurtado-Guerrero PhD, Maria Jesus Pinto-Medel PhD, Patricia Urbaneja, MD, Jose Luis Rodriguez Bada, Jesús Ortega-Pinazo, Pedro Serrano MD PhD, Óscar Fernández MD PhD, Laura Leyva, MD PhD, Begoña Oliver-Martos, PhD

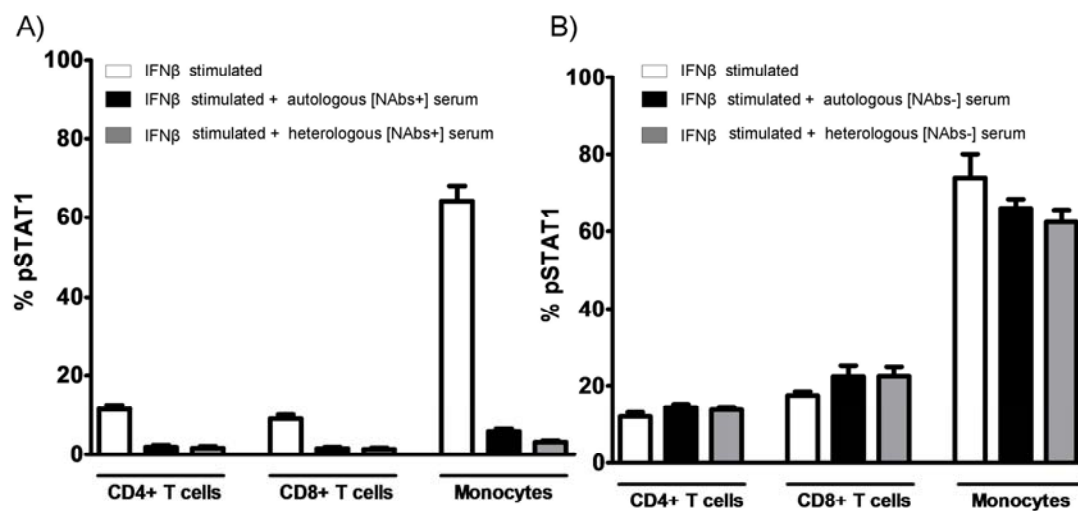

**Supplementary figure 1**

A) Expression of pSTAT1 determined by phosphoflow in CD4 + and CD8 + T lymphocytes and monocytes from MS patients after stimulation with 1000 IU/mL IFN $\beta$ 1a (Avonex) and in presence of a NAb positive autologous and heterologous serum. B) The same experiment was performed in presence of a NAb negative autologous and heterologous serum. The graphics show that the decrease of pSTAT1 occurred in presence of an autologous NAb positive sera but also in presence of an heterologous NAb positive sera. Autologous and heterologous NAb negative sera not decreased the level of pSTAT1.
